# Supplementary material for: What Are We Looking for in Computer-Based Learning Interventions in Medical Education? A Systematic Review
Source: PubMed Central journal article supplement (PMC4985611; doi:10.2196/jmir.5461), 2016-08-01
Supplement: jmir_v18i8e204_app1.pdf [file jmir_v18i8e204_app1.pdf]

## Appendix 1

### PubMed

```
(
    medical education OR
    education, medical[MeSH] OR
    medical students OR
    students, medical[MeSH]
) AND (
    evidence-based learning OR
    student-centered learning OR
    blended learning OR
    spaced learning OR
    e-learning
) AND (
    information technology OR
    e-learning software OR
    software[MeSH] OR
    software tool OR
    web-based platform OR
    blogging[MeSH] OR
    e-portfolio OR
    audience response system OR
    instant messaging OR
    streaming video OR
    computer simulation OR
    computer simulation[MeSH] OR
    computer games OR
    video games[MeSH] OR
    telecasts OR
    podcasts
) AND ("2003/01/01"[PDAT] : "2013/12/31"[PDAT])
```

## Scopus

```
(  
  ALL("medical education") OR  
  ALL("medical students")  
) AND (  
  ALL("evidence-based learning") OR  
  ALL("student-centered learning") OR  
  ALL("blended learning") OR  
  ALL("spaced learning") OR  
  ALL("e-learning")  
) AND (  
  ALL("information technology") OR  
  ALL("e-learning software") OR  
  ALL("software tool") OR  
  ALL("web-based platform") OR  
  ALL("e-portfolio") OR  
  ALL("audience response system") OR  
  ALL("instant messaging") OR  
  ALL("streaming video") OR  
  ALL("computer simulation") OR  
  ALL("computer games") OR  
  ALL("telecasts") OR  
  ALL("podcasts")  
)  
AND PUBYEAR > 2002  
AND PUBYEAR < 2014  
AND LANGUAGE(english)  
AND DOCTYPE(ar)
```

## EBSCO Host

*"medical education" OR "medical students"*

*AND*

*"evidence-based learning" OR*

*"student-centered learning" OR*

*"blended learning" OR*

*"spaced learning" OR*

*"e-learning"*

*AND*

*"information technology" OR*

*"e-learning software" OR*

*"software tool" OR*

*"web-based platform" OR*

*"e-portfolio" OR*

*"audience response system" OR*

*"instant messaging" OR*

*"streaming video" OR*

*"computer simulation" OR*

*"computer games" OR*

*"telecasts" OR*

*"podcasts"*

Source TX All Text

Limit to: scholarly (peer reviewed) journals

Source types: Academic journals

Date: 2003 - 2013

## Science Direct / Web of Knowledge

```
(  
  "medical education" OR  
  "medical students"  
)  
AND  
(  
  "evidence-based learning" OR  
  "student-centered learning" OR  
  "blended learning" OR  
  "spaced learning" OR  
  "e-learning"  
)  
AND  
(  
  "information technology" OR  
  "e-learning software" OR  
  "software tool" OR  
  "web-based platform" OR  
  "e-portfolio" OR  
  "audience response system" OR  
  "instant messaging" OR  
  "streaming video" OR  
  "computer simulation" OR  
  "computer games" OR  
  "telecasts" OR  
  "podcasts"  
)
```

Date: 2003 - 2013
