# Supplementary material for: What Are We Looking for in Computer-Based Learning Interventions in Medical Education? A Systematic Review
Source: PubMed Central journal article supplement (PMC4985611; doi:10.2196/jmir.5461), 2016-08-01
Supplement: jmir_v18i8e204_app2.pdf [file jmir_v18i8e204_app2.pdf]

## Appendix 2 - Educational software

### General educational software used in the studies

| Software                       | Articles | Description                 |
|--------------------------------|----------|-----------------------------|
| Blackboard [1–9]               | 8        | Learning management system  |
| Moodle [10–17]                 | 8        | Learning management system  |
| WebCT [18–23]                  | 6        | Learning management system  |
| Second Life [24,25]            | 2        | Online virtual world        |
| Adobe Connect [26]             | 1        | Web-conference software     |
| Angel LMS [27]                 | 1        | Learning management system  |
| Blender [28]                   | 1        | Open-source 3D software     |
| CLIX [29]                      | 1        | Learning management system  |
| Desire2Learn [30]              | 1        | Learning management system  |
| Discourse LLC [31]             | 1        | Virtual patient simulator   |
| Confluence [32]                | 1        | Team collaboration software |
| MediaWiki [33]                 | 1        | Wiki platform               |
| Microsoft Virtual Meeting [34] | 1        | Web-conference software     |
| Sakai [35]                     | 1        | Learning management system  |

### Medical education software used in the studies

| Software               | Articles | Description                     |
|------------------------|----------|---------------------------------|
| CASUS [36–39]          | 3        | Virtual patient simulator       |
| HINTS [40–42]          | 3        | Virtual patient simulator       |
| INMEDEA [43–45]        | 3        | Virtual patient simulator       |
| Web-SP [14,46,47]      | 3        | Virtual patient simulator       |
| MEFANET [48,49]        | 2        | Learning management system      |
| EleUM [2]              | 1        | Learning management system      |
| ICFAS [50]             | 1        | Web conferencing and LMS        |
| GeriaSims [51]         | 1        | Virtual patient simulator       |
| FACS [52]              | 1        | Virtual patient simulator       |
| EMSAVE [53]            | 1        | Serious 3D game                 |
| Xerte [54]             | 1        | Learning management system      |
| EKGtolkning [55]       | 1        | Electrocardiography learning    |
| INDIAM [56]            | 1        | Mammogram learning              |
| CaseTrain [57]         | 1        | Virtual patient simulator       |
| EEMeC [58]             | 1        | Learning management system      |
| ISP [59]               | 1        | Virtual patient simulator       |
| NLE [60]               | 1        | Learning management system      |
| Surgent [61]           | 1        | Virtual patient simulator       |
| SIMmersion [62]        | 1        | Virtual patient simulator       |
| Schoolbook [63]        | 1        | Learning management system      |
| Radiology Teacher [64] | 1        | Radiology cases learning system |
| IVIMEDS [65]           | 1        | Virtual patient simulator       |
| MyMiCROscope [66]      | 1        | Virtual microscope software     |
| MyCourses [67]         | 1        | Learning management system      |
| LRSMed [68]            | 1        | Learning management system      |

## References

1. Wiecha JM, Gramling R, Joachim P, Vanderschmidt H. Collaborative e-learning using streaming video and asynchronous discussion boards to teach the cognitive foundation of medical interviewing: a case study. *J Med Internet Res* 2003;5(2).
2. De Leng BA, Dolmans DH, Muijtjens AM, Van Der Vleuten CP. Student perceptions of a virtual learning environment for a problem-based learning undergraduate medical curriculum. *Med Educ* 2006;40(6):568–575.
3. Wiecha JM, Chetty V, Pollard T, Shaw PF. Web-based versus face-to-face learning of diabetes management: the results of a comparative trial of educational methods. *Fam Med-Kans CITY-* 2006;38(9):647.
4. Thakore H, McMahon T. Designing an Interactive Multimedia Rich Tutorial for Medical Students: Beyond a'Book on a Screen'. *J Vis Commun Med* 2008;31(1):4–10.
5. Cobus L. Using blogs and wikis in a graduate public health course. *Med Ref Serv Q* 2009;28(1):22–32.
6. Gray K, Tobin J. Introducing an online community into a clinical education setting: a pilot study of student and staff engagement and outcomes using blended learning. *BMC Med Educ* 2010;10(1):6.
7. Desai T, Stankeyeva D, Chapman A, Bailey J. Nephrology fellows show consistent use of, and improved knowledge from, a nephrologist-programmed teaching instrument. *J Nephrol* 2011;24(3):345.
8. Maggio MP, Hariton-Gross K, Gluch J. The use of independent, interactive media for education in dental morphology. *J Dent Educ* 2012;76(11):1497–1511.
9. Stebbings S, Bagheri N, Perrie K, Blyth P, McDonald J. Blended learning and curriculum renewal across three medical schools: The rheumatology module at the University of Otago. *Australas J Educ Technol* 2012;28(7):1176–1189.
10. Shah I, Walters M, McKillop J. Acute medicine teaching in an undergraduate medical curriculum: a blended learning approach. *Emerg Med J* 2008;25(6):354–357.
11. Kukolja Taradi S, \DJogaš Z, Dabić M, Drenjančević Perić I. Scaling-up undergraduate medical education: enabling virtual mobility by online elective courses. *Croat Med J* 2008;49(3):344–351.
12. Puljak L, Sapunar D. Web-Based Elective Courses for Medical Students: An Example in Pain. *Pain Med* 2011;12(6):854–863.
13. Sparacia G, Cannizzaro F, D'Alessandro DM, D'Alessandro MP, Caruso G, Lagalla R. Initial Experiences in Radiology e-Learning 1. *Radiographics* 2007;27(2):573–581.
14. Botezatu M, Hult H akan, Tessma MK, Fors UG. Virtual patient simulation for learning and assessment: Superior results in comparison with regular course exams. *Med Teach* 2010;32(10):845–850.
15. Seluakumaran K, Jusof FF, Ismail R, Husain R. Integrating an open-source course management system (Moodle) into the teaching of a first-year medical physiology course: a case study. *Adv Physiol Educ* 2011;35(4):369–377.
16. Worm BS, Jensen K. Does peer learning or higher levels of e-learning improve learning abilities? A randomized controlled trial. *Med Educ Online* 2013;18.

17. Iyeyasu JN, Sabbatini RME, Carvalho KM de. The development and evaluation of a distance learning system in ophthalmology. *Rev Bras Educ Médica* 2013;37(1):96–102.
18. Naidr J, Adla T, Janda A, Feberova J, Kasal P, Hladikova M. Long-term retention of knowledge after a distance course in medical informatics at Charles University Prague. *Teach Learn Med* 2004;16(3):255–259.
19. Taradi SK, Taradi M, Radić K, Pokrajac N. Blending problem-based learning with Web technology positively impacts student learning outcomes in acid-base physiology. *Adv Physiol Educ* 2005;29(1):35–39.
20. Bernhardt J, Hye F, Thallinger S, Bauer P, Ginter G, Smolle J. Simulation of a mycological KOH preparation—e-learning as a practical dermatologic exercise in an undergraduate medical curriculum. *JDDG J Dtsch Dermatol Ges* 2009;7(7):597–601.
21. Kandasamy T, Fung K. Interactive Internet-based cases for undergraduate otolaryngology education. *Otolaryngol Neck Surg* 2009;140(3):398–402.
22. Hu A, Wilson T, Ladak H, Haase P, Doyle P, Fung K. Evaluation of a three-dimensional educational computer model of the larynx: voicing a new direction. *J Otolaryngol-Head Neck Surg J Oto-Rhino-Laryngol Chir Cervico-Faciale* 2010;39(3):315–322.
23. Tan S, Hu A, Wilson T, Ladak H, Haase P, Fung K. Role of a computer-generated three-dimensional laryngeal model in anatomy teaching for advanced learners. *J Laryngol Otol* 2012;126(04):395–401.
24. Boulos MNK, Hetherington L, Wheeler S. Second Life: an overview of the potential of 3-D virtual worlds in medical and health education. *Health Inf Libr J* 2007;24(4):233–245.
25. Andrade AD, Cifuentes P, Mintzer MJ, Roos BA, Anam R, Ruiz JG. Simulating geriatric home safety assessments in a three-dimensional virtual world. *Gerontol Geriatr Educ* 2012;33(3):233–252.
26. Foroudi F, Pham D, Bressel M, Tongs D, Rolfo A, Styles C, et al. The utility of e-Learning to support training for a multicentre bladder online adaptive radiotherapy trial (TROG 10.01-BOLART). *Radiother Oncol* 2013;109(1):165–169.
27. Ruiz JG, Smith M, Rodriguez O, Van Zuilen MH, Mintzer MJ. An interactive e-learning tutorial for medical students on how to conduct the performance-oriented mobility assessment. *Gerontol Geriatr Educ* 2007;28(1):51–60.
28. Codd AM, Choudhury B. Virtual reality anatomy: Is it comparable with traditional methods in the teaching of human forearm musculoskeletal anatomy? *Anat Sci Educ* 2011;4(3):119–125.
29. Raupach T, Münscher C, Pukrop T, Anders S, Harendza S. Significant increase in factual knowledge with web-assisted problem-based learning as part of an undergraduate cardio-respiratory curriculum. *Adv Health Sci Educ* 2010;15(3):349–356.
30. Kumar AB, Hata JS, Bayman EO, Krishnan S. Implementing a hybrid web-based curriculum for an elective medical student clerkship in a busy surgical intensive care unit (ICU): Effect on test and satisfaction scores. *J Surg Educ* 2013;70(1):109–116.
31. Yang RL, Hashimoto DA, Predina JD, Bowens NM, Sonnenberg EM, Cleveland EC, et al. The virtual-patient pilot: testing a new tool for undergraduate surgical education and assessment. *J Surg Educ* 2013;70(3):394–401.
32. Harris ST, Zeng X. Using wiki in an online record documentation systems course. *Perspect Health Inf Manag Am Health Inf Manag Assoc* 2008;5.

33. Durosaro O, Lachman N, Pawlina W. Use of knowledge-sharing Web-based portal in gross and microscopic anatomy. *Ann Acad Med Singap* 2008;37(12):998.
34. Carriero A, Zobel BB, Bonomo L, Meloni G, Cotroneo A, Cova M, et al. E-learning in radiology: Italian multicentre experience. *Radiol Med (Torino)* 2011;116(7):989–999.
35. McCleskey PE. Clinic teaching made easy: A prospective study of the American Academy of Dermatology core curriculum in primary care learners. *J Am Acad Dermatol* 2013;69(2):273–279.
36. Fischer MR, Schauer S, Gräsel C, Baehring T, Mandl H, Gärtner R, et al. [CASUS model trial. A computer-assisted author system for problem-oriented learning in medicine]. *Z Für Ärztl Fortbild* 1996 Aug;90(5):385–389. PMID: 9157728
37. Abendroth M, Harendza S, Riemer M. Clinical decision making: a pilot e-learning study. *Clin Teach* 2013;10(1):51–55.
38. Maier EM, Hege I, Muntau AC, Huber J, Fischer MR. What are effects of a spaced activation of virtual patients in a pediatric course? *BMC Med Educ* 2013;13(1):45.
39. Radon K, Kolb S, Reichert J, Baumeister T, Fuchs R, Hege I, et al. Case-based e-learning in occupational medicine- the NetWoRM Project in Germany. *Ann Agric Environ Med* 2006;13(1):93–98.
40. Chen L-S, Cheng Y-M, Weng S-F, Chen Y-G, Lin C-H. Applications of a time sequence mechanism in the simulation cases of a web-based medical problem-based learning system. *Educ Technol Soc* 2009;12(1):149.
41. Cheng Y-M, Chen L-S, Huang H-C, Weng S-F, Chen Y-G, Lin C-H. Building a general purpose pedagogical agent in a web-based multimedia clinical simulation system for medical education. *Learn Technol IEEE Trans On* 2009;2(3):216–225.
42. Cheng Y-M, Kuo S-H, Lou S-J, Shih R-C. The Effect of Applying Online PBL Case System to Multiple Disciplines of Medical Education. *Turk Online J Educ Technol-TOJET* 2012;11(4):283–294.
43. Horstmann M, Horstmann C, Renninger M. Case Creation and E-Learning in a Web-Based Virtual Department of Urology Using the INMEDEA Simulator. *Nephro-Urol Mon* 2011;4(01):356–360.
44. Funke K, Bonrath E, Mardin WA, Becker JC, Haier J, Senninger N, et al. Blended learning in surgery using the Inmedea Simulator. *Langenbecks Arch Surg* 2013;398(2):335–340.
45. Wünschel M, Leichtle U, Wülker N, Kluba T. Using a web-based orthopaedic clinic in the curricular teaching of a German university hospital: analysis of learning effect, student usage and reception. *Int J Med Inf* 2010;79(10):716–721.
46. Botezatu M, Hult H akan, Tessma MK, Fors U. Virtual patient simulation: Knowledge gain or knowledge loss? *Med Teach* 2010;32(7):562–568.
47. Gunning WT, Fors UG. Virtual patients for assessment of medical student ability to integrate clinical and laboratory data to develop differential diagnoses: comparison of results of exams with/without time constraints. *Med Teach* 2012;34(4):e222–e228.
48. Schwarz D, Štourač P, Komenda M, Harazim H, Kosinová M, Gregor J, et al. Interactive algorithms for teaching and learning acute medicine in the network of medical faculties MEFANET. *J Med Internet Res* 2013;15(7).

49. Komenda M, Schwarz D, Feberová J, Štípek S, Mihál V, Dušek L. Medical faculties educational network: Multidimensional quality assessment. *Comput Methods Programs Biomed* 2012;108(3):900–909.
50. Kneebone R, Bello F, Nestel D, Mooney N, Codling A, Yadollahi F, et al. Learner-centred feedback using remote assessment of clinical procedures. *Med Teach* 2008;30(8):795–801.
51. Orton E, Mulhausen P. E-learning virtual patients for geriatric education. *Gerontol Geriatr Educ* 2008;28(3):73–88.
52. Leung JY, Critchley LA, Yung AL, Kumta SM. Introduction of virtual patients onto a final year anesthesia course: Hong Kong experience. *Adv Med Educ Pract* 2011;2:71.
53. Buttussi F, Pellis T, Vidani AC, Pausler D, Carchietti E, Chittaro L. Evaluation of a 3D serious game for advanced life support retraining. *Int J Med Inf* 2013;82(9):798–809.
54. Daunt LA, Umeonusulu PI, Gladman JR, Blundell AG, Conroy SP, Gordon AL. Undergraduate teaching in geriatric medicine using computer-aided learning improves student performance in examinations. *Age Ageing* 2013;42(4):541–544.
55. Nilsson M, Bolinder G, Held C, Johansson B-L, Fors U, Östergren J. Evaluation of a web-based ECG-interpretation programme for undergraduate medical students. *BMC Med Educ* 2008;8(1):25.
56. Guliato D, Bôaventura RS, Maia MA, Rangayyan RM, Smedo MS, Macedo TA. INDIAM —an e-learning system for the interpretation of mammograms. *J Digit Imaging* 2009;22(4):405–420.
57. Diessl S, Verburg FA, Hoernlein A, Schumann M, Luster M, Reiners C. Evaluation of an internet-based e-learning module to introduce nuclear medicine to medical students: a feasibility study. *Nucl Med Commun* 2010;31(12):1063–1067.
58. Ellaway R, Dewhurst D, Cumming A. Managing and supporting medical education with a virtual learning environment: the Edinburgh Electronic Medical Curriculum. *Med Teach* 2003;25(4):372–380.
59. Courteille O, Bergin R, Courteille O, Bergin R, Stockeld D, Ponzer S, et al. The use of a virtual patient case in an OSCE-based exam—a pilot study. *Med Teach* 2008;30(3):e66–e76.
60. Roberts C, Lawson M, Newble D, Self A. Managing the learning environment in undergraduate medical education: the Sheffield approach. *Med Teach* 2003;25(3):282–286.
61. Corrigan M, Reardon M, Shields C, Redmond H. “SURGENT”—student e-learning for reality: The application of interactive visual images to problem-based learning in undergraduate surgery. *J Surg Educ* 2008;65(2):120–125.
62. Fleming M, Olsen D, Stathes H, Boteler L, Grossberg P, Pfeifer J, et al. Virtual reality skills training for health care professionals in alcohol screening and brief intervention. *J Am Board Fam Med* 2009;22(4):387–398.
63. Citak M, Calafi A, Kendoff D, Kupka T, Haasper C, Behrends M, et al. An internet based learning tool in orthopaedic surgery: preliminary experiences and results. *Technol Health Care* 2009;17(2):141–148.
64. Talanow R. Radiology Teacher: a free, Internet-based radiology teaching file server. *J Am Coll Radiol* 2009;6(12):871–875.

65. Gormley GJ, Mcglade K, Thomson C, Mcgill M, Sun J. A virtual surgery in general practice: Evaluation of a novel undergraduate virtual patient learning package. *Med Teach* 2011;33(10):e522–e527.
66. Schmidt C, Reinehr M, Leucht O, Behrendt N, Geiler S, Britsch S. MyMiCROscope—Intelligent virtual microscopy in a blended learning model at Ulm University. *Ann Anat-Anat Anz* 2011;193(5):395–402.
67. Shaffer K, Small JE. Blended learning in medical education: use of an integrated approach with web-based small group modules and didactic instruction for teaching radiologic anatomy. *Acad Radiol* 2004 Sep;11(9):1059–70. PMID: 15350588
68. Geueke M, Stausberg J. A meta-data-based learning resource server for medicine. *Comput Methods Programs Biomed* 2003;72(3):197–208.
